# Supplementary material for: Revealing the Hidden: A Qualitative Study of Learning Disabilities Among Medical and Nursing Students in Vietnam
Source: Research Square preprint supplement (doi:10.21203/rs.3.rs-8111766/v1), 2026-01-12
Supplement: Supplementary file 1 [file fcf127424043d48ded26ef6e.docx]

## ***Interview guide***

Table 1. Focus-group interview guide for Qualitative data collection

| **No** | **Questions** |
| --- | --- |
| **1** | Please share with us what ‘learning disability’ means to you. |
| **2** | Have you ever met students with learning disabilities?   1. If YES, please share with us your experiences with students with learning disabilities in Vietnam? Please discuss any specific situations or interactions  - Positive, negative experiences of working with this group of students - Challenges, difficulties when working with this group of students  1. If NO, imagine/assuming your classmate/schoolmate has a learning disability, please share the situations, challenges or difficulties you can think of when studying and working with that student.  - Challenges, difficulties you can think of |
| **3** | From your perspective, how to identify the presence of LD among students?  Once identified, how to offer proper support and address their needs?  Within your institution, how feasible do you think these approaches are?  What makes you think so?  Please elaborate on any experiences or insights you may have regarding this issue. |
| **4** | What type of support services do you think would be appropriate in assisting medical and nursing students in Vietnam who face challenges of learning disabilities?  What makes you think so?  Feel free to discuss any potential approaches or resources that come to mind. |
| **5** | As a university student, do you think that you received sufficient training for people with a learning disability?  What makes you think so?  Please share your thoughts or experiences related to this training, if any. |
| **6** | What kind of training do you believe would enhance your confidence and competence in working and learning with students who have learning disabilities?  What makes you think so?  Feel free to discuss any specific topics or areas you feel would be beneficial. |
| **7** | In your opinion, are there any support services for university students with learning disabilities in Vietnam currently?   1. If YES, do the current support services adequately and effectively cater to medical and nursing students in Vietnam? What makes you think so? Feel free to discuss any potential resources or approaches that need improvement. 2. If NO/UNCERTAIN, ***proceed to question 8***. |
| **8** | Considering students living with learning disabilities, do you feel adequately prepared to meet their unique needs?  Please tell me why you feel adequate/inadequate about this.  Please elaborate on any gaps you perceive in your training or knowledge. |
| **9** | In your view, what can/how the service provision for students with learning disabilities be improved in Vietnam? |
| **10** | Should students with learning disabilities have different equipment or books from other peers?  (i) If ‘Yes’: why do this group need different equipment or books from other peers?  (ii) If ‘No’: what makes you believe so?  (iii) If ‘Not sure’: please tell me more why you are unsure about this  (iv) Further prompts:  • What would useful additional resources for students with learning disabilities would be?  • Who should pay for additional resources for this group of students? Why?  • What happens if students with learning disabilities do not have additional resources? |
| **11** | Would it be better if all students with learning disabilities went to schools/join a specific curriculum that are only for people with learning disabilities?  Why? / Why not? Please do elaborate more. |
| **12** | Is there any advice you would like to give to students living with learning disabilities? |
